# Supplementary material for: Small molecule induced self-assembly of Au nanoparticles
Source: Royal Society of Chemistry journal article supplement (doi:10.1039/c0jm04268d), 2011-01-01
Supplement: c0jm04268d.pdf [file c0jm04268d.pdf]

## Small molecule induced one dimensional assembly of Au nanoparticles

Jaewook Lee, Hongjian Zhou, Jaebeom Lee\*

Department of Nanomedical Engineering, Pusan National University, Miryang, 627-706, Korea

\* Corresponding author: [jaebeom@pusan.ac.kr](mailto:jaebeom@pusan.ac.kr)  
TEL: +82) 55-350-5298, FAX: +82) 55-350-5299

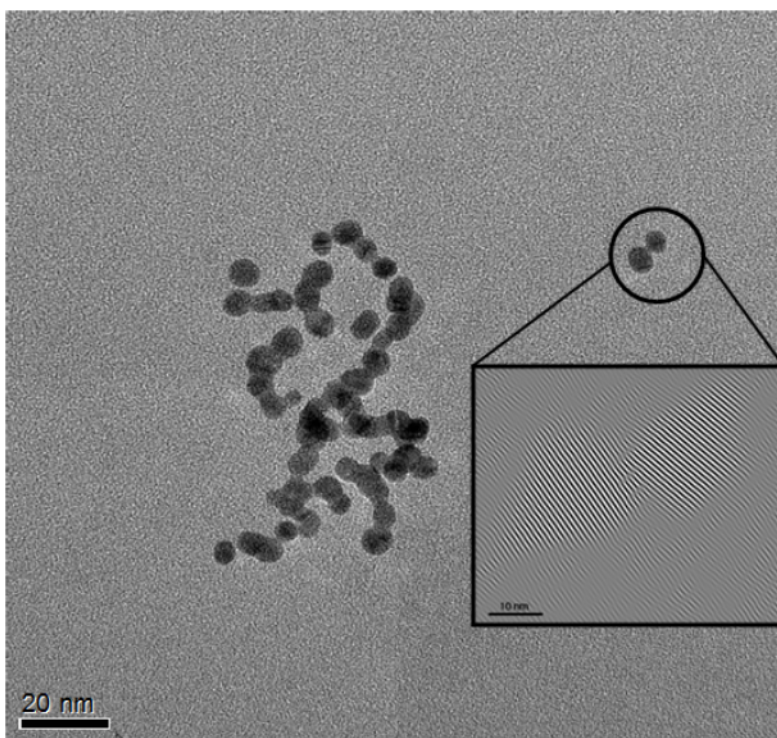

Supplementary Figure (SF) 1: HR-TEM image of Au chains with 0.005 M of EDC and lattice image of Au chains (in a box)

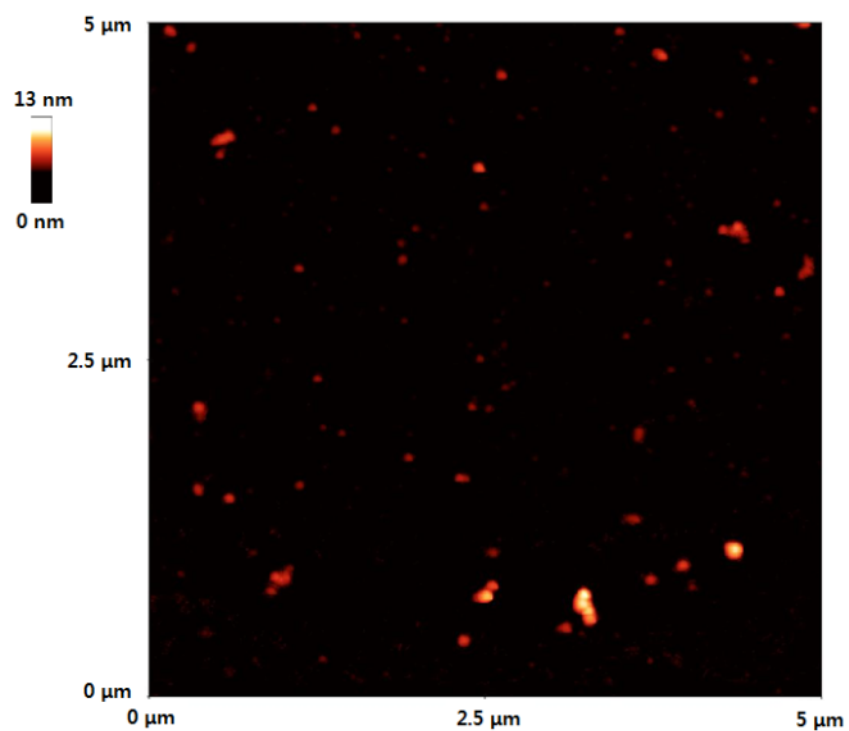

Supplementary Figure (SF) 2: AFM image of Au chains with 0.002M of EDC on the PDDA treated Si wafer (scan rate: 0.3 Hz and scan lines: 512)

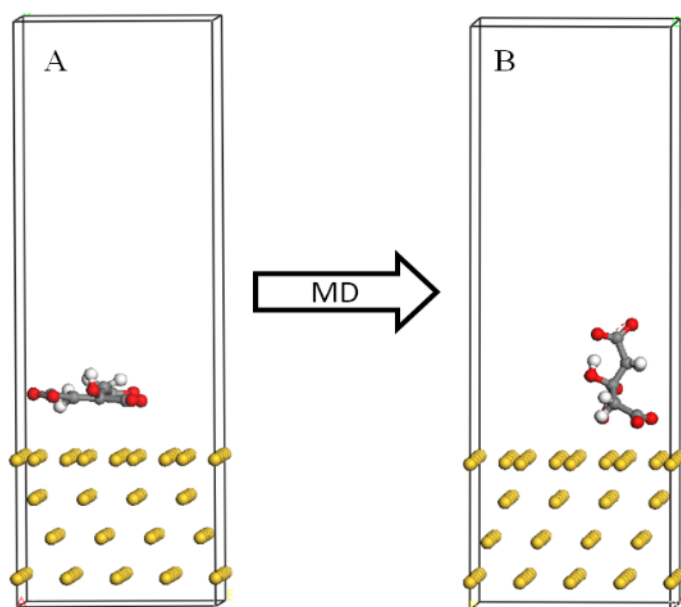

Supplementary Figure (SF) 3: snapshots of the Au/Citrate model before and after MD simulation: A. before MD simulation; B. after MD simulation

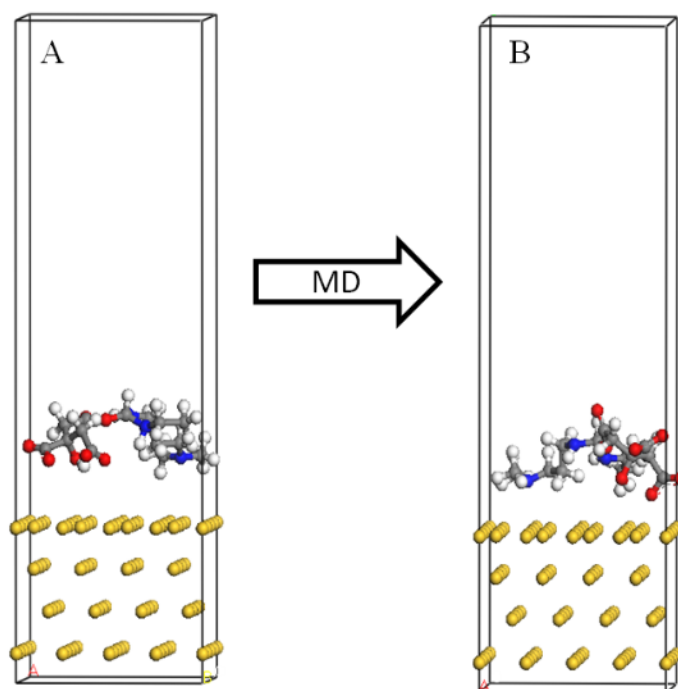

Supplementary Figure (SF) 4: snapshots of the Au/Citrate-EDC-Citrate model before and after MD simulation: A. before MD simulation; B. after MD simulation

Supplementary Table (ST) 1 non-bonding energies between Au and organism

| Surface  | Organism            | $E_{\text{non-bond}}$<br>( $\text{kcal}\cdot\text{mol}^{-1}$ ) | $E_{\text{vdW}}$ ( $\text{kcal}\cdot\text{mol}^{-1}$ ) |                     | $E_{\text{coulomb}}$<br>( $\text{kcal}\cdot\text{mol}^{-1}$ ) |
|----------|---------------------|----------------------------------------------------------------|--------------------------------------------------------|---------------------|---------------------------------------------------------------|
|          |                     |                                                                | Repulsive                                              | Dispersive          |                                                               |
| Au (111) | Citrate             | $2.214\times 10^5$                                             | $2.717\times 10^5$                                     | $-5049\times 10^4$  | -220.121                                                      |
| Au (111) | Citrate-EDC         | $2.210\times 10^5$                                             | $2.719\times 10^5$                                     | $-5.069\times 10^5$ | -187.793                                                      |
| Au (111) | Citrate-EDC-Citrate | $4.416\times 10^5$                                             | $5.438\times 10^5$                                     | $-1.020\times 10^5$ | -178.360                                                      |
